# Supplementary material
Source: Springer Nature journal article supplement (https://www.springermedizin.de/resource/supplementary/12936_2012_2609_MOESM12_ESM.pdf/9543310)

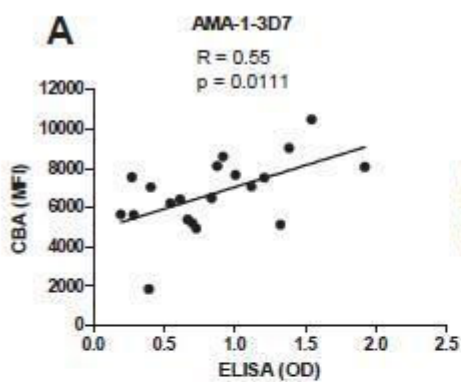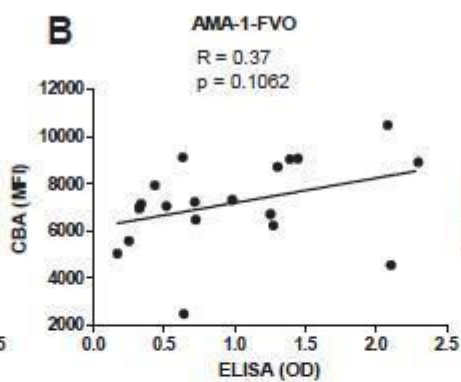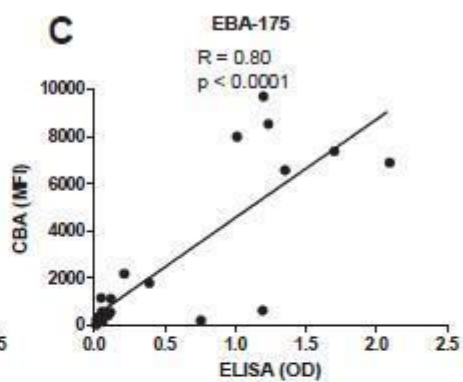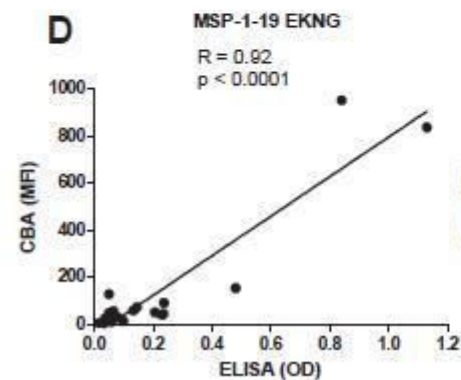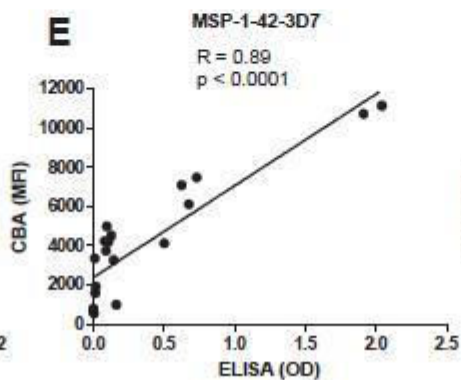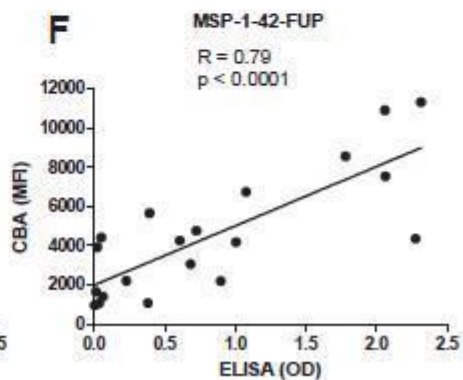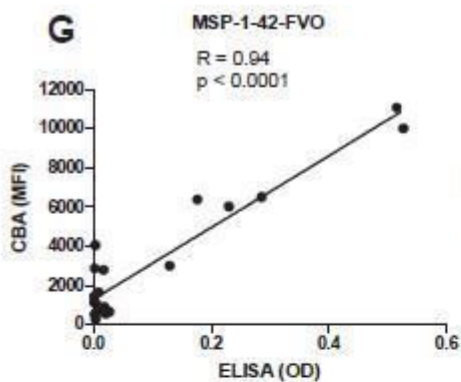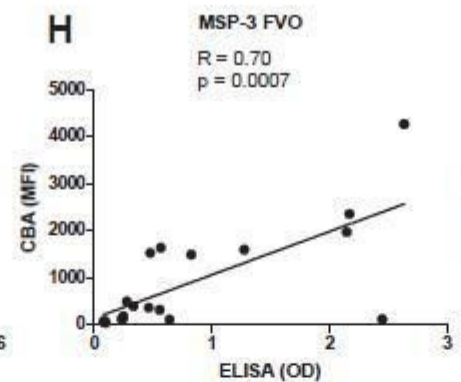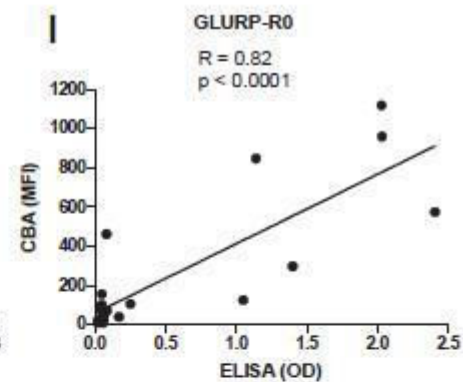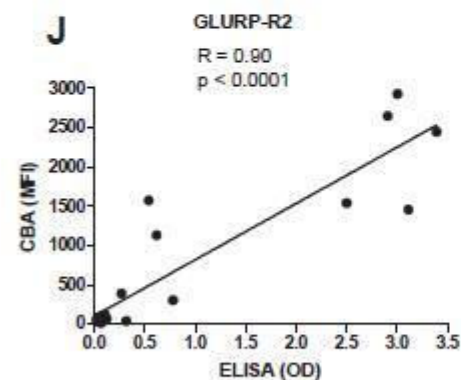

Supplement: MOESM12 [file 9543310]
